# Supplementary material for: Host Plant Modulated Physio-Biochemical Process Enhances Adaptive Response of Sandalwood (Santalum album L.) under Salinity Stress
Source: MDPI journal article supplement (doi:10.3390/plants13081162), 2024-04-22
Supplement: s1 [file s1]

**Table S1.** Effect of various hosts on diameter and biomass of sandalwood under salinity stress.

| Salinity/<br>Host species                | Diameter (mm)     |                                            |                                            |                                         |                   | Biomass (g)         |                                            |                                            |                                            |                     |
|------------------------------------------|-------------------|--------------------------------------------|--------------------------------------------|-----------------------------------------|-------------------|---------------------|--------------------------------------------|--------------------------------------------|--------------------------------------------|---------------------|
|                                          | Control           | EC <sub>iw</sub> 3.0<br>dS m <sup>-1</sup> | EC <sub>iw</sub> 6.0 dS<br>m <sup>-1</sup> | EC <sub>iw</sub> 9.0 dS m <sup>-1</sup> | Mean              | Control             | EC <sub>iw</sub> 3.0 dS<br>m <sup>-1</sup> | EC <sub>iw</sub> 6.0<br>dS m <sup>-1</sup> | EC <sub>iw</sub> 9.0<br>dS m <sup>-1</sup> | Mean                |
| <i>M. dubia</i>                          | 8.03              | 7.21                                       | 6.64                                       | 5.98                                    | 6.96 <sup>a</sup> | 154.30              | 123.39                                     | 89.51                                      | 64.37                                      | 107.89 <sup>a</sup> |
| <i>C. equisetifolia</i>                  | 6.21              | 5.82                                       | 4.08                                       | 3.37                                    | 4.87 <sup>d</sup> | 135.27              | 92.67                                      | 69.48                                      | 44.54                                      | 85.49 <sup>c</sup>  |
| <i>C. aurantium</i>                      | 6.51              | 5.98                                       | 5.52                                       | 4.36                                    | 5.59 <sup>b</sup> | 113.99              | 86.98                                      | 58.52                                      | 32.49                                      | 72.99 <sup>d</sup>  |
| <i>P. emblica</i>                        | 5.97              | 5.17                                       | 4.74                                       | 4.08                                    | 4.99 <sup>d</sup> | 84.35               | 69.59                                      | 47.40                                      | 28.55                                      | 57.47 <sup>f</sup>  |
| <i>S. cumini</i>                         | 5.35              | 5.07                                       | 4.36                                       | 3.74                                    | 4.63 <sup>e</sup> | 90.86               | 60.11                                      | 50.49                                      | 28.02                                      | 57.37 <sup>f</sup>  |
| <i>A. ampliceps</i>                      | 5.14              | 4.77                                       | 4.26                                       | 3.43                                    | 4.4 <sup>fg</sup> | 104.37              | 78.91                                      | 42.51                                      | 24.14                                      | 62.48 <sup>e</sup>  |
| <i>P. granatum</i>                       | 5.19              | 4.88                                       | 4.03                                       | 3.59                                    | 4.42 <sup>f</sup> | 66.43               | 54.76                                      | 34.76                                      | 21.07                                      | 44.25 <sup>g</sup>  |
| <i>A. indica</i>                         | 6.03              | 5.85                                       | 5.06                                       | 4.62                                    | 5.39 <sup>c</sup> | 117.62              | 102.4                                      | 84.25                                      | 50.88                                      | 88.79 <sup>b</sup>  |
| <i>L. leucocephala</i>                   | 4.97              | 4.50                                       | 4.02                                       | 3.41                                    | 4.23 <sup>g</sup> | 74.98               | 49.82                                      | 38.2                                       | 20.32                                      | 45.83 <sup>g</sup>  |
| <i>D. sissoo</i>                         | 7.90              | 6.96                                       | 6.58                                       | 6.04                                    | 6.87 <sup>a</sup> | 145.33              | 122.07                                     | 96.02                                      | 65.98                                      | 107.35 <sup>a</sup> |
| Mean                                     | 6.13 <sup>a</sup> | 5.62 <sup>b</sup>                          | 4.93 <sup>c</sup>                          | 4.26 <sup>d</sup>                       |                   | 108.75 <sup>a</sup> | 84.07 <sup>b</sup>                         | 61.11 <sup>c</sup>                         | 38.04 <sup>d</sup>                         |                     |
| HSD <sub>0.05</sub> (Host)               | 0.19              |                                            |                                            |                                         |                   | 2.86                |                                            |                                            |                                            |                     |
| HSD <sub>0.05</sub> (Salinity)           | 0.11              |                                            |                                            |                                         |                   | 1.56                |                                            |                                            |                                            |                     |
| HSD <sub>0.05</sub> (Host ×<br>Salinity) | 0.46              |                                            |                                            |                                         |                   | 7.11                |                                            |                                            |                                            |                     |

The values carrying different alphabetical superscripts (<sup>a,b,c,d,...</sup>) within the columns above, differ significantly amongst themselves (p<0.05). Values are mean ± standard deviations.

**Table S2.** Effect of various hosts on water and osmotic potential of sandalwood under salinity stress.

| Salinity/<br>Host species             | Water potential (MPa) |                                            |                                            |                                            |                     | Osmatic potential (MPa) |                                            |                                            |                                            |                     | Relative water content (%) |                                            |                                            |                                            |                       |
|---------------------------------------|-----------------------|--------------------------------------------|--------------------------------------------|--------------------------------------------|---------------------|-------------------------|--------------------------------------------|--------------------------------------------|--------------------------------------------|---------------------|----------------------------|--------------------------------------------|--------------------------------------------|--------------------------------------------|-----------------------|
|                                       | Control               | EC <sub>iw</sub> 3.0<br>dS m <sup>-1</sup> | EC <sub>iw</sub> 6.0<br>dS m <sup>-1</sup> | EC <sub>iw</sub> 9.0<br>dS m <sup>-1</sup> | Mean                | Control                 | EC <sub>iw</sub> 3.0<br>dS m <sup>-1</sup> | EC <sub>iw</sub> 6.0<br>dS m <sup>-1</sup> | EC <sub>iw</sub> 9.0<br>dS m <sup>-1</sup> | Mean                | Control                    | EC <sub>iw</sub> 3.0<br>dS m <sup>-1</sup> | EC <sub>iw</sub> 6.0<br>dS m <sup>-1</sup> | EC <sub>iw</sub> 9.0<br>dS m <sup>-1</sup> | Mean                  |
| <i>M. dubia</i>                       | -1.31                 | -1.64                                      | -2.06                                      | -2.92                                      | -1.98 <sup>a</sup>  | -1.53                   | -1.91                                      | -2.81                                      | -3.54                                      | -2.45 <sup>a</sup>  | 75.93                      | 72.30                                      | 68.59                                      | 64.14                                      | 70.24 <sup>abcd</sup> |
| <i>C. equisetifolia</i>               | -1.54                 | -2.36                                      | -2.99                                      | -3.64                                      | -2.63 <sup>c</sup>  | -1.67                   | -2.62                                      | -3.64                                      | -4.36                                      | -3.07 <sup>de</sup> | 78.85                      | 76.29                                      | 67.02                                      | 62.75                                      | 71.23 <sup>abc</sup>  |
| <i>C. aurantium</i>                   | -1.11                 | -2.07                                      | -2.80                                      | -3.61                                      | -2.40 <sup>bc</sup> | -1.47                   | -2.57                                      | -3.61                                      | -4.32                                      | -2.99 <sup>cd</sup> | 80.15                      | 76.83                                      | 65.50                                      | 53.44                                      | 68.98 <sup>cde</sup>  |
| <i>P. emblica</i>                     | -1.35                 | -1.98                                      | -2.70                                      | -3.54                                      | -2.39 <sup>bc</sup> | -1.71                   | -2.21                                      | -3.36                                      | -4.46                                      | -2.94 <sup>c</sup>  | 75.13                      | 70.46                                      | 65.89                                      | 57.67                                      | 67.29 <sup>e</sup>    |
| <i>S. cumini</i>                      | -1.42                 | -2.14                                      | -3.26                                      | -3.81                                      | -2.66 <sup>c</sup>  | -1.85                   | -2.52                                      | -3.86                                      | -4.63                                      | -3.22 <sup>f</sup>  | 77.26                      | 70.96                                      | 69.22                                      | 54.13                                      | 67.89 <sup>de</sup>   |
| <i>A. ampliceps</i>                   | -1.26                 | -2.16                                      | -2.61                                      | -3.08                                      | -2.28 <sup>ab</sup> | -1.49                   | -2.51                                      | -3.40                                      | -3.66                                      | -2.77 <sup>b</sup>  | 74.05                      | 73.73                                      | 71.68                                      | 58.62                                      | 69.52 <sup>bcde</sup> |
| <i>P. granatum</i>                    | -1.51                 | -2.27                                      | -2.65                                      | -3.39                                      | -2.46 <sup>bc</sup> | -1.94                   | -2.61                                      | -3.36                                      | -4.11                                      | -3.01 <sup>cd</sup> | 78.60                      | 78.01                                      | 76.25                                      | 58.85                                      | 72.93 <sup>a</sup>    |
| <i>A. indica</i>                      | -1.44                 | -1.98                                      | -2.48                                      | -2.96                                      | -2.22 <sup>ab</sup> | -1.71                   | -2.16                                      | -3.21                                      | -3.58                                      | -2.67 <sup>b</sup>  | 77.59                      | 74.70                                      | 71.22                                      | 60.68                                      | 71.05 <sup>abc</sup>  |
| <i>L. leucocephala</i>                | -1.46                 | -2.26                                      | -2.62                                      | -3.32                                      | -2.42 <sup>bc</sup> | -1.90                   | -2.89                                      | -3.60                                      | -4.24                                      | -3.16 <sup>ef</sup> | 78.83                      | 78.06                                      | 69.79                                      | 55.29                                      | 70.49 <sup>abcd</sup> |
| <i>D. sissoo</i>                      | -1.55                 | -2.08                                      | -2.46                                      | -3.12                                      | -2.30 <sup>b</sup>  | -1.81                   | -2.31                                      | -3.17                                      | -3.66                                      | -2.74 <sup>b</sup>  | 74.86                      | 74.39                                      | 71.23                                      | 66.56                                      | 71.76 <sup>ab</sup>   |
| Mean                                  | -1.40 <sup>a</sup>    | -2.09 <sup>b</sup>                         | -2.66 <sup>c</sup>                         | -3.34 <sup>d</sup>                         |                     | -1.71 <sup>a</sup>      | -2.43 <sup>b</sup>                         | -3.40 <sup>c</sup>                         | -4.06 <sup>d</sup>                         |                     | 77.12                      | 74.57                                      | 69.64                                      | 59.21                                      |                       |
| HSD <sub>0.05</sub> (Host)            | 0.31                  |                                            |                                            |                                            |                     | 0.12                    |                                            |                                            |                                            |                     | 2.76                       |                                            |                                            |                                            |                       |
| HSD <sub>0.05</sub> (Salinity)        | 0.18                  |                                            |                                            |                                            |                     | 0.15                    |                                            |                                            |                                            |                     | 1.16                       |                                            |                                            |                                            |                       |
| HSD <sub>0.05</sub> (Host × Salinity) | 0.78                  |                                            |                                            |                                            |                     | 0.30                    |                                            |                                            |                                            |                     | 6.87                       |                                            |                                            |                                            |                       |

The values carrying different alphabetical superscripts (<sup>a,b,c,d,...</sup>) within the columns above, differ significantly amongst themselves (p<0.05). Values are mean ± standard deviations.

**Table S3. Sodium content of sandalwood grown with different host at variable salinity levels.**

| Host species                               | Salinity Treatment |                                            |                                            |                                         |                    |
|--------------------------------------------|--------------------|--------------------------------------------|--------------------------------------------|-----------------------------------------|--------------------|
|                                            | Control            | EC <sub>iw</sub> 3.0 dS<br>m <sup>-1</sup> | EC <sub>iw</sub> 6.0 dS<br>m <sup>-1</sup> | EC <sub>iw</sub> 9.0 dS m <sup>-1</sup> | Mean               |
| <i>M. dubia</i>                            | 1.22               | 1.46                                       | 1.82                                       | 2.23                                    | 1.68 <sup>e</sup>  |
| <i>C. equisetifolia</i>                    | 1.37               | 1.68                                       | 1.96                                       | 2.52                                    | 1.88 <sup>c</sup>  |
| <i>C. aurantium</i>                        | 1.41               | 1.74                                       | 2.04                                       | 2.65                                    | 1.96 <sup>b</sup>  |
| <i>P. emblica</i>                          | 1.35               | 1.68                                       | 1.98                                       | 2.59                                    | 1.90 <sup>bc</sup> |
| <i>S. cumini</i>                           | 1.48               | 1.84                                       | 2.28                                       | 2.76                                    | 2.09 <sup>a</sup>  |
| <i>A. ampliceps</i>                        | 1.25               | 1.53                                       | 1.94                                       | 2.37                                    | 1.77 <sup>d</sup>  |
| <i>P. granatum</i>                         | 1.34               | 1.65                                       | 2.12                                       | 2.58                                    | 1.92 <sup>bc</sup> |
| <i>A. indica</i>                           | 1.24               | 1.48                                       | 1.83                                       | 2.31                                    | 1.72 <sup>de</sup> |
| <i>L. leucocephala</i>                     | 1.28               | 1.59                                       | 1.85                                       | 2.36                                    | 1.77 <sup>d</sup>  |
| <i>D. sissoo</i>                           | 1.23               | 1.45                                       | 1.70                                       | 2.03                                    | 1.60 <sup>f</sup>  |
| <b>Mean</b>                                | 1.32 <sup>d</sup>  | 1.61 <sup>c</sup>                          | 1.95 <sup>b</sup>                          | 2.44 <sup>a</sup>                       |                    |
| <b>HSD<sub>0.05</sub>(Host)</b>            | 0.07               |                                            |                                            |                                         |                    |
| <b>HSD<sub>0.05</sub>(Salinity)</b>        | 0.04               |                                            |                                            |                                         |                    |
| <b>HSD<sub>0.05</sub>(Host × Salinity)</b> | 0.16               |                                            |                                            |                                         |                    |

The values carrying different alphabetical superscripts (<sup>a,b,c,d,...</sup>) within the columns above, differ significantly amongst themselves (p<0.05). Values are mean ± standard deviations.

**Table S4. Potassium content of sandalwood grown with different host at variable salinity levels.**

| Host species                               | Salinity Treatment |                                            |                                            |                                         |                    |
|--------------------------------------------|--------------------|--------------------------------------------|--------------------------------------------|-----------------------------------------|--------------------|
|                                            | Control            | EC <sub>iw</sub> 3.0 dS<br>m <sup>-1</sup> | EC <sub>iw</sub> 6.0 dS<br>m <sup>-1</sup> | EC <sub>iw</sub> 9.0 dS m <sup>-1</sup> | Mean               |
| <i>M. dubia</i>                            | 2.65               | 2.51                                       | 2.35                                       | 1.98                                    | 2.37 <sup>a</sup>  |
| <i>C. equisetifolia</i>                    | 2.58               | 2.40                                       | 2.14                                       | 1.83                                    | 2.24 <sup>b</sup>  |
| <i>C. aurantium</i>                        | 2.52               | 2.38                                       | 2.05                                       | 1.71                                    | 2.16 <sup>c</sup>  |
| <i>P. emblica</i>                          | 2.46               | 2.31                                       | 1.98                                       | 1.62                                    | 2.09 <sup>d</sup>  |
| <i>S. cumini</i>                           | 2.47               | 2.25                                       | 2.08                                       | 1.74                                    | 2.13 <sup>cd</sup> |
| <i>A. ampliceps</i>                        | 2.38               | 2.23                                       | 1.99                                       | 1.79                                    | 2.10 <sup>cd</sup> |
| <i>P. granatum</i>                         | 2.36               | 2.13                                       | 1.85                                       | 1.69                                    | 2.01 <sup>e</sup>  |
| <i>A. indica</i>                           | 2.60               | 2.47                                       | 2.25                                       | 1.99                                    | 2.33 <sup>a</sup>  |
| <i>L. leucocephala</i>                     | 2.39               | 2.22                                       | 2.04                                       | 1.73                                    | 2.09 <sup>d</sup>  |
| <i>D. sissoo</i>                           | 2.62               | 2.50                                       | 2.37                                       | 1.99                                    | 2.37 <sup>a</sup>  |
| <b>Mean</b>                                | 2.50 <sup>a</sup>  | 2.34 <sup>b</sup>                          | 2.11 <sup>c</sup>                          | 1.81 <sup>d</sup>                       |                    |
| <b>HSD<sub>0.05</sub>(Host)</b>            | 0.07               |                                            |                                            |                                         |                    |
| <b>HSD<sub>0.05</sub>(Salinity)</b>        | 0.05               |                                            |                                            |                                         |                    |
| <b>HSD<sub>0.05</sub>(Host × Salinity)</b> | 0.17               |                                            |                                            |                                         |                    |

The values carrying different alphabetical superscripts (<sup>a,b,c,d,...</sup>) within the columns above, differ significantly amongst themselves (p<0.05). Values are mean ± standard deviations.

**Table S5. Calcium content of sandalwood grown with different host at variable salinity levels.**

| Host species                               | Salinity Treatment |                                            |                                            |                                         |                   |
|--------------------------------------------|--------------------|--------------------------------------------|--------------------------------------------|-----------------------------------------|-------------------|
|                                            | Control            | EC <sub>iw</sub> 3.0 dS<br>m <sup>-1</sup> | EC <sub>iw</sub> 6.0 dS<br>m <sup>-1</sup> | EC <sub>iw</sub> 9.0 dS m <sup>-1</sup> | Mean              |
| <i>M. dubia</i>                            | 1.80               | 1.68                                       | 1.57                                       | 1.47                                    | 1.63 <sup>a</sup> |
| <i>C. equisetifolia</i>                    | 1.76               | 1.61                                       | 1.44                                       | 1.28                                    | 1.52 <sup>c</sup> |
| <i>C. aurantium</i>                        | 1.53               | 1.38                                       | 1.22                                       | 1.07                                    | 1.30 <sup>d</sup> |
| <i>P. emblica</i>                          | 1.32               | 1.19                                       | 1.05                                       | 0.92                                    | 1.12 <sup>g</sup> |
| <i>S. cumini</i>                           | 1.46               | 1.32                                       | 1.16                                       | 1.02                                    | 1.24 <sup>e</sup> |
| <i>A. ampliceps</i>                        | 1.17               | 1.06                                       | 0.94                                       | 0.82                                    | 1.00 <sup>h</sup> |
| <i>P. granatum</i>                         | 1.39               | 1.26                                       | 1.12                                       | 0.97                                    | 1.19 <sup>f</sup> |
| <i>A. indica</i>                           | 1.68               | 1.56                                       | 1.45                                       | 1.32                                    | 1.50 <sup>c</sup> |
| <i>L. leucocephala</i>                     | 1.45               | 1.31                                       | 1.16                                       | 1.01                                    | 1.23 <sup>e</sup> |
| <i>D. sissoo</i>                           | 1.69               | 1.62                                       | 1.55                                       | 1.44                                    | 1.58 <sup>b</sup> |
| <b>Mean</b>                                | 1.53 <sup>a</sup>  | 1.40 <sup>b</sup>                          | 1.27 <sup>c</sup>                          | 1.13 <sup>d</sup>                       |                   |
| <b>HSD<sub>0.05</sub>(Host)</b>            | 0.04               |                                            |                                            |                                         |                   |
| <b>HSD<sub>0.05</sub>(Salinity)</b>        | 0.02               |                                            |                                            |                                         |                   |
| <b>HSD<sub>0.05</sub>(Host × Salinity)</b> | 0.11               |                                            |                                            |                                         |                   |

The values carrying different alphabetical superscripts (<sup>a,b,c,d,...</sup>) within the columns above, differ significantly amongst themselves (p<0.05). Values are mean ± standard deviations.

**Table S6. Magnesium content of sandalwood grown with different host at variable salinity levels.**

| Host species                               | Salinity Treatment |                                            |                                            |                                         |                    |
|--------------------------------------------|--------------------|--------------------------------------------|--------------------------------------------|-----------------------------------------|--------------------|
|                                            | Control            | EC <sub>iw</sub> 3.0 dS<br>m <sup>-1</sup> | EC <sub>iw</sub> 6.0 dS<br>m <sup>-1</sup> | EC <sub>iw</sub> 9.0 dS m <sup>-1</sup> | Mean               |
| <i>M. dubia</i>                            | 0.92               | 0.90                                       | 0.87                                       | 0.84                                    | 0.88 <sup>a</sup>  |
| <i>C. equisetifolia</i>                    | 0.83               | 0.81                                       | 0.78                                       | 0.74                                    | 0.79 <sup>b</sup>  |
| <i>C. aurantium</i>                        | 0.77               | 0.74                                       | 0.71                                       | 0.67                                    | 0.72 <sup>c</sup>  |
| <i>P. emblica</i>                          | 0.64               | 0.61                                       | 0.59                                       | 0.55                                    | 0.60 <sup>e</sup>  |
| <i>S. cumini</i>                           | 0.73               | 0.70                                       | 0.67                                       | 0.64                                    | 0.69 <sup>d</sup>  |
| <i>A. ampliceps</i>                        | 0.66               | 0.64                                       | 0.61                                       | 0.57                                    | 0.62 <sup>fg</sup> |
| <i>P. granatum</i>                         | 0.70               | 0.67                                       | 0.64                                       | 0.60                                    | 0.65 <sup>e</sup>  |
| <i>A. indica</i>                           | 0.81               | 0.79                                       | 0.76                                       | 0.73                                    | 0.77 <sup>b</sup>  |
| <i>L. leucocephala</i>                     | 0.68               | 0.66                                       | 0.63                                       | 0.59                                    | 0.64 <sup>ef</sup> |
| <i>D. sissoo</i>                           | 0.89               | 0.88                                       | 0.87                                       | 0.85                                    | 0.87 <sup>a</sup>  |
| <b>Mean</b>                                | 0.76 <sup>a</sup>  | 0.74 <sup>b</sup>                          | 0.71 <sup>c</sup>                          | 0.68 <sup>d</sup>                       |                    |
| <b>HSD<sub>0.05</sub>(Host)</b>            | 0.03               |                                            |                                            |                                         |                    |
| <b>HSD<sub>0.05</sub>(Salinity)</b>        | 0.02               |                                            |                                            |                                         |                    |
| <b>HSD<sub>0.05</sub>(Host × Salinity)</b> | 0.07               |                                            |                                            |                                         |                    |

The values carrying different alphabetical superscripts (<sup>a,b,c,d,...</sup>) within the columns above, differ significantly amongst themselves (p<0.05). Values are mean ± standard deviations.

**Table S7. Membrane injury of sandalwood grown with different host at variable salinity levels.**

| Host species                          | Salinity Treatment |                                         |                                         |                                         |                      |
|---------------------------------------|--------------------|-----------------------------------------|-----------------------------------------|-----------------------------------------|----------------------|
|                                       | Control            | EC <sub>iw</sub> 3.0 dS m <sup>-1</sup> | EC <sub>iw</sub> 6.0 dS m <sup>-1</sup> | EC <sub>iw</sub> 9.0 dS m <sup>-1</sup> | Mean                 |
| <i>M. dubia</i>                       | 10.85              | 18.49                                   | 28.71                                   | 31.42                                   | 22.37 <sup>i</sup>   |
| <i>C. equisetifolia</i>               | 13.31              | 26.76                                   | 33.19                                   | 39.67                                   | 28.23 <sup>cd</sup>  |
| <i>C. aurantium</i>                   | 13.96              | 28.29                                   | 36.35                                   | 41.95                                   | 30.14 <sup>a</sup>   |
| <i>P. emblica</i>                     | 12.02              | 25.27                                   | 34.15                                   | 38.32                                   | 27.44 <sup>d</sup>   |
| <i>S. cumini</i>                      | 14.38              | 23.07                                   | 34.21                                   | 43.99                                   | 28.91 <sup>bc</sup>  |
| <i>A. ampliceps</i>                   | 13.09              | 16.15                                   | 28.28                                   | 36.68                                   | 23.55 <sup>e</sup>   |
| <i>P. granatum</i>                    | 12.17              | 25.97                                   | 38.37                                   | 42.62                                   | 29.78 <sup>ab</sup>  |
| <i>A. indica</i>                      | 13.07              | 23.36                                   | 34.91                                   | 38.38                                   | 27.43 <sup>d</sup>   |
| <i>L. leucocephala</i>                | 12.85              | 26.43                                   | 35.82                                   | 40.93                                   | 29.01 <sup>abc</sup> |
| <i>D. sissoo</i>                      | 11.25              | 17.37                                   | 24.22                                   | 33.03                                   | 21.47 <sup>f</sup>   |
| Mean                                  | 12.70 <sup>d</sup> | 23.11 <sup>c</sup>                      | 32.82 <sup>b</sup>                      | 38.70 <sup>a</sup>                      |                      |
| HSD <sub>0.05</sub> (Host)            | 1.15               |                                         |                                         |                                         |                      |
| HSD <sub>0.05</sub> (Salinity)        | 0.57               |                                         |                                         |                                         |                      |
| HSD <sub>0.05</sub> (Host × Salinity) | 2.87               |                                         |                                         |                                         |                      |

The values carrying different alphabetical superscripts (a,b,c,d,...) within the columns above, differ significantly amongst themselves (p<0.05). Values are mean ± standard deviations.

**Table S8. Malondialdehyde (MDA) content of sandalwood grown with different host at variable salinity levels.**

| Host species                          | Salinity Treatment |                                         |                                         |                                         |                    |
|---------------------------------------|--------------------|-----------------------------------------|-----------------------------------------|-----------------------------------------|--------------------|
|                                       | Control            | EC <sub>iw</sub> 3.0 dS m <sup>-1</sup> | EC <sub>iw</sub> 6.0 dS m <sup>-1</sup> | EC <sub>iw</sub> 9.0 dS m <sup>-1</sup> | Mean               |
| <i>M. dubia</i>                       | 0.97               | 0.98                                    | 1.03                                    | 1.24                                    | 1.05 <sup>a</sup>  |
| <i>C. equisetifolia</i>               | 0.86               | 0.96                                    | 0.97                                    | 1.20                                    | 1.00 <sup>bc</sup> |
| <i>C. aurantium</i>                   | 0.79               | 0.90                                    | 1.07                                    | 1.14                                    | 0.98 <sup>cd</sup> |
| <i>P. emblica</i>                     | 0.90               | 0.96                                    | 1.02                                    | 1.19                                    | 1.02 <sup>ab</sup> |
| <i>S. cumini</i>                      | 0.86               | 0.96                                    | 1.05                                    | 1.19                                    | 1.02 <sup>b</sup>  |
| <i>A. ampliceps</i>                   | 0.79               | 0.82                                    | 0.95                                    | 0.99                                    | 0.89 <sup>g</sup>  |
| <i>P. granatum</i>                    | 0.81               | 0.90                                    | 0.98                                    | 1.10                                    | 0.95 <sup>de</sup> |
| <i>A. indica</i>                      | 0.80               | 0.86                                    | 0.90                                    | 1.05                                    | 0.90 <sup>fg</sup> |
| <i>L. leucocephala</i>                | 0.80               | 0.86                                    | 0.95                                    | 1.07                                    | 0.92 <sup>ef</sup> |
| <i>D. sissoo</i>                      | 0.81               | 0.85                                    | 0.89                                    | 0.97                                    | 0.88 <sup>g</sup>  |
| Mean                                  | 0.84 <sup>d</sup>  | 0.90 <sup>c</sup>                       | 0.98 <sup>b</sup>                       | 1.11 <sup>a</sup>                       |                    |
| HSD <sub>0.05</sub> (Host)            | 0.033              |                                         |                                         |                                         |                    |
| HSD <sub>0.05</sub> (Salinity)        | 0.019              |                                         |                                         |                                         |                    |
| HSD <sub>0.05</sub> (Host × Salinity) | 0.082              |                                         |                                         |                                         |                    |

The values carrying different alphabetical superscripts (a,b,c,d,...) within the columns above, differ significantly amongst themselves (p<0.05). Values are mean ± standard deviations.

**Table S9. Ascorbate peroxidase (APX) (units g<sup>-1</sup> FW) activity of sandalwood grown with different host at variable salinity levels.**

| Host species                               | Salinity Treatment |                                            |                                            |                                         |                   |
|--------------------------------------------|--------------------|--------------------------------------------|--------------------------------------------|-----------------------------------------|-------------------|
|                                            | Control            | EC <sub>iw</sub> 3.0 dS<br>m <sup>-1</sup> | EC <sub>iw</sub> 6.0 dS<br>m <sup>-1</sup> | EC <sub>iw</sub> 9.0 dS m <sup>-1</sup> | Mean              |
| <i>M. dubia</i>                            | 0.79               | 1.69                                       | 2.53                                       | 3.60                                    | 2.15 <sup>a</sup> |
| <i>C. equisetifolia</i>                    | 0.62               | 0.64                                       | 1.23                                       | 1.90                                    | 1.10 <sup>f</sup> |
| <i>C. aurantium</i>                        | 0.48               | 0.55                                       | 0.89                                       | 1.25                                    | 0.79 <sup>h</sup> |
| <i>P. emblica</i>                          | 0.48               | 0.57                                       | 1.24                                       | 2.29                                    | 1.14 <sup>f</sup> |
| <i>S. cumini</i>                           | 0.43               | 0.49                                       | 0.67                                       | 1.01                                    | 0.65 <sup>i</sup> |
| <i>A. ampliceps</i>                        | 0.74               | 0.99                                       | 1.39                                       | 2.46                                    | 1.39 <sup>d</sup> |
| <i>P. granatum</i>                         | 0.40               | 0.59                                       | 0.99                                       | 1.60                                    | 0.89 <sup>g</sup> |
| <i>A. indica</i>                           | 0.66               | 1.05                                       | 1.74                                       | 3.10                                    | 1.64 <sup>c</sup> |
| <i>L. leucocephala</i>                     | 0.56               | 0.94                                       | 1.43                                       | 1.95                                    | 1.22 <sup>e</sup> |
| <i>D. sissoo</i>                           | 0.68               | 1.34                                       | 2.06                                       | 3.32                                    | 1.85 <sup>b</sup> |
| <b>Mean</b>                                | 0.58 <sup>d</sup>  | 0.88 <sup>c</sup>                          | 1.42 <sup>b</sup>                          | 2.25 <sup>a</sup>                       |                   |
| <b>HSD<sub>0.05</sub>(Host)</b>            | 0.07               |                                            |                                            |                                         |                   |
| <b>HSD<sub>0.05</sub>(Salinity)</b>        | 0.03               |                                            |                                            |                                         |                   |
| <b>HSD<sub>0.05</sub>(Host × Salinity)</b> | 0.16               |                                            |                                            |                                         |                   |

The values carrying different alphabetical superscripts (a,b,c,d,...) within the columns above, differ significantly amongst themselves (p<0.05). Values are mean ± standard deviations.

**Table S10. Catalase (CAT) (units g<sup>-1</sup> FW) activity of sandalwood grown with different host at variable salinity levels.**

| Host species                               | Salinity Treatment |                                            |                                            |                                         |                    |
|--------------------------------------------|--------------------|--------------------------------------------|--------------------------------------------|-----------------------------------------|--------------------|
|                                            | Control            | EC <sub>iw</sub> 3.0 dS<br>m <sup>-1</sup> | EC <sub>iw</sub> 6.0 dS<br>m <sup>-1</sup> | EC <sub>iw</sub> 9.0 dS m <sup>-1</sup> | Mean               |
| <i>M. dubia</i>                            | 0.14               | 0.19                                       | 0.26                                       | 0.36                                    | 0.24 <sup>b</sup>  |
| <i>C. equisetifolia</i>                    | 0.12               | 0.15                                       | 0.19                                       | 0.27                                    | 0.18 <sup>f</sup>  |
| <i>C. aurantium</i>                        | 0.09               | 0.14                                       | 0.17                                       | 0.22                                    | 0.16 <sup>g</sup>  |
| <i>P. emblica</i>                          | 0.15               | 0.19                                       | 0.22                                       | 0.29                                    | 0.21 <sup>de</sup> |
| <i>S. cumini</i>                           | 0.10               | 0.14                                       | 0.17                                       | 0.24                                    | 0.16 <sup>g</sup>  |
| <i>A. ampliceps</i>                        | 0.15               | 0.19                                       | 0.27                                       | 0.30                                    | 0.22 <sup>c</sup>  |
| <i>P. granatum</i>                         | 0.11               | 0.15                                       | 0.19                                       | 0.27                                    | 0.18 <sup>f</sup>  |
| <i>A. indica</i>                           | 0.12               | 0.18                                       | 0.24                                       | 0.33                                    | 0.22 <sup>cd</sup> |
| <i>L. leucocephala</i>                     | 0.13               | 0.17                                       | 0.23                                       | 0.30                                    | 0.21 <sup>e</sup>  |
| <i>D. sissoo</i>                           | 0.14               | 0.22                                       | 0.28                                       | 0.37                                    | 0.25 <sup>a</sup>  |
| <b>Mean</b>                                | 0.12 <sup>d</sup>  | 0.17 <sup>c</sup>                          | 0.22 <sup>b</sup>                          | 0.30 <sup>a</sup>                       |                    |
| <b>HSD<sub>0.05</sub>(Host)</b>            | 0.008              |                                            |                                            |                                         |                    |
| <b>HSD<sub>0.05</sub>(Salinity)</b>        | 0.003              |                                            |                                            |                                         |                    |
| <b>HSD<sub>0.05</sub>(Host × Salinity)</b> | 0.020              |                                            |                                            |                                         |                    |

The values carrying different alphabetical superscripts (a,b,c,d,...) within the columns above, differ significantly amongst themselves (p<0.05). Values are mean ± standard deviations.

**Table S11. Peroxidase (POX) (units g<sup>-1</sup> FW) activity of sandalwood grown with different host at variable salinity levels.**

| Host species                               | Salinity Treatment  |                                            |                                            |                                         |                      |
|--------------------------------------------|---------------------|--------------------------------------------|--------------------------------------------|-----------------------------------------|----------------------|
|                                            | Control             | EC <sub>iw</sub> 3.0 dS<br>m <sup>-1</sup> | EC <sub>iw</sub> 6.0 dS<br>m <sup>-1</sup> | EC <sub>iw</sub> 9.0 dS m <sup>-1</sup> | Mean                 |
| <i>M. dubia</i>                            | 195.58              | 258.71                                     | 304.07                                     | 458.86                                  | 304.30 <sup>a</sup>  |
| <i>C. equisetifolia</i>                    | 178.11              | 248.18                                     | 298.18                                     | 366.17                                  | 272.66 <sup>c</sup>  |
| <i>C. aurantium</i>                        | 218.73              | 261.97                                     | 294.34                                     | 310.55                                  | 271.40 <sup>c</sup>  |
| <i>P. emblica</i>                          | 207.82              | 235.76                                     | 252.66                                     | 351.87                                  | 262.03 <sup>de</sup> |
| <i>S. cumini</i>                           | 204.41              | 241.82                                     | 290.74                                     | 327.92                                  | 266.22 <sup>cd</sup> |
| <i>A. ampliceps</i>                        | 151.67              | 179.05                                     | 238.60                                     | 317.42                                  | 221.68 <sup>g</sup>  |
| <i>P. granatum</i>                         | 161.77              | 227.07                                     | 282.37                                     | 341.49                                  | 253.17 <sup>e</sup>  |
| <i>A. indica</i>                           | 219.44              | 258.33                                     | 343.21                                     | 407.89                                  | 307.22 <sup>a</sup>  |
| <i>L. leucocephala</i>                     | 155.11              | 200.29                                     | 277.52                                     | 318.27                                  | 237.80 <sup>f</sup>  |
| <i>D. sissoo</i>                           | 156.87              | 227.76                                     | 369.46                                     | 424.16                                  | 294.56 <sup>b</sup>  |
| <b>Mean</b>                                | 184.95 <sup>d</sup> | 233.89 <sup>c</sup>                        | 295.11 <sup>b</sup>                        | 362.46 <sup>a</sup>                     |                      |
| <b>HSD<sub>0.05</sub>(Host)</b>            | 9.04                |                                            |                                            |                                         |                      |
| <b>HSD<sub>0.05</sub>(Salinity)</b>        | 5.58                |                                            |                                            |                                         |                      |
| <b>HSD<sub>0.05</sub>(Host × Salinity)</b> | 22.48               |                                            |                                            |                                         |                      |

The values carrying different alphabetical superscripts (<sup>a,b,c,d,...</sup>) within the columns above, differ significantly amongst themselves (p<0.05). Values are mean ± standard deviations.

**Table S12. Superoxide dismutase (SOD) (units g<sup>-1</sup> FW) activity of sandalwood grown with different host at variable salinity levels.**

| Host species                               | Salinity Treatment |                                            |                                            |                                         |                     |
|--------------------------------------------|--------------------|--------------------------------------------|--------------------------------------------|-----------------------------------------|---------------------|
|                                            | Control            | EC <sub>iw</sub> 3.0 dS<br>m <sup>-1</sup> | EC <sub>iw</sub> 6.0 dS<br>m <sup>-1</sup> | EC <sub>iw</sub> 9.0 dS m <sup>-1</sup> | Mean                |
| <i>M. dubia</i>                            | 11.54              | 21.03                                      | 31.74                                      | 39.63                                   | 25.98 <sup>a</sup>  |
| <i>C. equisetifolia</i>                    | 13.55              | 19.02                                      | 25.62                                      | 30.01                                   | 22.05 <sup>b</sup>  |
| <i>C. aurantium</i>                        | 8.37               | 9.97                                       | 11.01                                      | 16.85                                   | 11.55 <sup>ef</sup> |
| <i>P. emblica</i>                          | 6.86               | 12.93                                      | 16.11                                      | 23.24                                   | 14.78 <sup>d</sup>  |
| <i>S. cumini</i>                           | 7.76               | 9.62                                       | 10.42                                      | 15.48                                   | 10.82 <sup>f</sup>  |
| <i>A. ampliceps</i>                        | 6.68               | 9.37                                       | 14.18                                      | 20.55                                   | 12.69 <sup>e</sup>  |
| <i>P. granatum</i>                         | 6.54               | 7.63                                       | 11.76                                      | 19.00                                   | 11.23 <sup>ef</sup> |
| <i>A. indica</i>                           | 9.04               | 17.01                                      | 22.97                                      | 30.09                                   | 19.78 <sup>c</sup>  |
| <i>L. leucocephala</i>                     | 8.15               | 11.69                                      | 17.53                                      | 22.43                                   | 14.95 <sup>d</sup>  |
| <i>D. sissoo</i>                           | 9.12               | 16.11                                      | 25.44                                      | 36.05                                   | 21.68 <sup>b</sup>  |
| <b>Mean</b>                                | 8.76 <sup>d</sup>  | 13.44 <sup>c</sup>                         | 18.68 <sup>b</sup>                         | 25.33 <sup>a</sup>                      |                     |
| <b>HSD<sub>0.05</sub>(Host)</b>            | 1.68               |                                            |                                            |                                         |                     |
| <b>HSD<sub>0.05</sub>(Salinity)</b>        | 2.57               |                                            |                                            |                                         |                     |
| <b>HSD<sub>0.05</sub>(Host × Salinity)</b> |                    |                                            |                                            |                                         |                     |

The values carrying different alphabetical superscripts (<sup>a,b,c,d,...</sup>) within the columns above, differ significantly amongst themselves (p<0.05). Values are mean ± standard deviations.

**Table S13. Glutathione reductase (GR) (units g<sup>-1</sup> FW) activity of sandalwood grown with different host at variable salinity levels.**

| Host species                               | Salinity Treatment |                                            |                                            |                                         |                   |
|--------------------------------------------|--------------------|--------------------------------------------|--------------------------------------------|-----------------------------------------|-------------------|
|                                            | Control            | EC <sub>iw</sub> 3.0 dS<br>m <sup>-1</sup> | EC <sub>iw</sub> 6.0 dS<br>m <sup>-1</sup> | EC <sub>iw</sub> 9.0 dS m <sup>-1</sup> | Mean              |
| <i>M. dubia</i>                            | 1.58               | 1.75                                       | 1.98                                       | 2.19                                    | 1.88 <sup>a</sup> |
| <i>C. equisetifolia</i>                    | 0.86               | 0.99                                       | 1.11                                       | 1.53                                    | 1.12 <sup>d</sup> |
| <i>C. aurantium</i>                        | 0.50               | 0.53                                       | 0.55                                       | 0.74                                    | 0.58 <sup>g</sup> |
| <i>P. emblica</i>                          | 0.54               | 0.64                                       | 0.80                                       | 0.93                                    | 0.73 <sup>f</sup> |
| <i>S. cumini</i>                           | 0.52               | 0.64                                       | 0.81                                       | 0.97                                    | 0.73 <sup>f</sup> |
| <i>A. ampliceps</i>                        | 0.70               | 0.80                                       | 1.22                                       | 1.64                                    | 1.09 <sup>d</sup> |
| <i>P. granatum</i>                         | 1.14               | 1.17                                       | 1.08                                       | 1.00                                    | 1.10 <sup>d</sup> |
| <i>A. indica</i>                           | 1.41               | 1.77                                       | 1.88                                       | 2.10                                    | 1.79 <sup>b</sup> |
| <i>L. leucocephala</i>                     | 0.41               | 0.75                                       | 1.04                                       | 1.43                                    | 0.91 <sup>e</sup> |
| <i>D. sissoo</i>                           | 1.22               | 1.53                                       | 1.97                                       | 2.07                                    | 1.70 <sup>c</sup> |
| <b>Mean</b>                                | 0.89 <sup>d</sup>  | 1.06 <sup>c</sup>                          | 1.25 <sup>b</sup>                          | 1.46 <sup>a</sup>                       |                   |
| <b>HSD<sub>0.05</sub>(Host)</b>            | 0.06               |                                            |                                            |                                         |                   |
| <b>HSD<sub>0.05</sub>(Salinity)</b>        | 0.04               |                                            |                                            |                                         |                   |
| <b>HSD<sub>0.05</sub>(Host × Salinity)</b> | 0.13               |                                            |                                            |                                         |                   |

The values carrying different alphabetical superscripts (<sup>a,b,c,d,...</sup>) within the columns above, differ significantly amongst themselves (p<0.05). Values are mean ± standard deviations.

**Table S14a.** Host preferential and ranks of the host in control condition estimated through weighted coefficients ( $\beta_s$ ).

| Host names              | Constant ( $\alpha$ ) | 0.82×<br>RWC                                                                                                                                                                                                                                                                         | (-8.05)×<br>Pn | (-3.62)×<br>K | (-40.27)×<br>NaK | (-90.35)×<br>MDA | 64.27×<br>APX | (-0.32)×<br>POX | 3.76×<br>SOD | 7.75×<br>GR | 8.48×<br>WP | 17.57×<br>DIA | PBIO   | Rank | Actual<br>Bio | Rank |
|-------------------------|-----------------------|--------------------------------------------------------------------------------------------------------------------------------------------------------------------------------------------------------------------------------------------------------------------------------------|----------------|---------------|------------------|------------------|---------------|-----------------|--------------|-------------|-------------|---------------|--------|------|---------------|------|
| Melia dubia             | 74.29                 | 62.26                                                                                                                                                                                                                                                                                | -38.96         | -18.35        | -10.56           | -87.28           | 50.56         | -62.59          | 43.39        | 12.25       | -11.11      | 140.97        | 154.86 | 1    | 154.3         | 1    |
| Dalbergia sissoo        |                       | 61.39                                                                                                                                                                                                                                                                                | -51.01         | -22.58        | -8.02            | -72.73           | 43.92         | -50.20          | 34.28        | 9.51        | -13.14      | 138.86        | 144.56 | 2    | 145.33        | 2    |
| Casuarina equisetifolia |                       | 64.66                                                                                                                                                                                                                                                                                | -28.42         | -19.67        | -15.96           | -77.82           | 40.06         | -56.98          | 50.95        | 6.67        | -13.06      | 109.11        | 133.83 | 3    | 135.27        | 3    |
| Azadirachta indica      |                       | 63.63                                                                                                                                                                                                                                                                                | -27.58         | -17.06        | -15.52           | -72.37           | 42.85         | -70.22          | 33.98        | 10.93       | -12.21      | 105.89        | 116.59 | 4    | 117.62        | 4    |
| Citrus aurantium        |                       | 65.72                                                                                                                                                                                                                                                                                | -20.82         | -17.86        | -17.38           | -71.68           | 31.06         | -69.99          | 31.47        | 3.82        | -9.41       | 114.44        | 113.67 | 5    | 113.99        | 5    |
| Acacia ampliceps        |                       | 60.73                                                                                                                                                                                                                                                                                | -37.70         | -17.22        | -13.21           | -71.26           | 47.56         | -48.53          | 25.12        | 5.48        | -10.68      | 90.37         | 104.93 | 6    | 104.37        | 6    |
| Syzygium cumini         |                       | 63.35                                                                                                                                                                                                                                                                                | -19.91         | -17.89        | -9.32            | -77.70           | 27.42         | -65.41          | 29.18        | 4.03        | -12.04      | 93.94         | 89.94  | 7    | 90.86         | 7    |
| Phyllanthus emblica     |                       | 61.60                                                                                                                                                                                                                                                                                | -24.85         | -18.68        | -14.04           | -81.38           | 31.06         | -66.50          | 25.78        | 4.19        | -11.45      | 104.83        | 84.87  | 8    | 84.35         | 8    |
| Leucaena leucocephala   |                       | 64.64                                                                                                                                                                                                                                                                                | -57.80         | -15.40        | -13.47           | -72.49           | 35.99         | -49.63          | 30.66        | 3.13        | -12.38      | 87.32         | 74.86  | 9    | 74.98         | 9    |
| Punica granatum         |                       | 64.45                                                                                                                                                                                                                                                                                | -52.06         | -19.57        | -12.27           | -73.61           | 25.49         | -51.77          | 24.59        | 8.86        | -12.80      | 91.31         | 66.92  | 10   | 66.43         | 10   |
|                         |                       | <b>Model Fitted: Predicted Biomass ~ 74.29+ 0.82 RWC+(-8.05)<sub>Pn</sub>+(-3.62)<sub>K</sub>+(-40.57)<sub>NaK</sub>+(-90.35)<sub>MDA</sub>+64.27<sub>APX</sub>+ (-0.32)<sub>POX</sub>+ 3.76<sub>SOD</sub>+ 7.75<sub>GR</sub>+ 8.48<sub>WP</sub>+ 17.57<sub>Dia</sub> : R²= 0.98</b> |                |               |                  |                  |               |                 |              |             |             |               |        |      |               |      |



**Table S14c.** Host preferential and ranks of the host in moderate salinity stress ( $EC_{iw} \sim 6 \text{ dSm}^{-1}$ ).

[illegible]



**Table S15.** Characteristics of host plant species used in the experiment.

| Common name     | Binomial name                                                 | Family        | Wild/<br>cultivated | Plant type | Nature    | Leguminous<br>(N <sub>2</sub> fixing<br>ability) |
|-----------------|---------------------------------------------------------------|---------------|---------------------|------------|-----------|--------------------------------------------------|
| *Lal mehndi     | <i>Alternanthera dentata</i><br>(Moench) Stuebel ex R. E. Fr. | Amaranthaceae | Cultivated          | Dicot      | Evergreen | (✗)                                              |
| Malabar Neem    | <i>Melia dubia</i> Cav.                                       | Meliaceae     | Cultivated          | Dicot      | Deciduous | (✗)                                              |
| #Whistling pine | <i>Casuarina equisetifolia</i> L.                             | Casuarinaceae | Wild                | Dicot      | Evergreen | (✓)                                              |
| Nimbu           | <i>Citrus aurantium</i> L.                                    | Rutaceae      | Cultivated          | Dicot      | Evergreen | (✗)                                              |
| Aonla           | <i>Phyllanthus emblica</i> L.                                 | Meliaceae     | Cultivated          | Dicot      | Deciduous | (✗)                                              |
| Jamun           | <i>Syzygium cumini</i> (L.) Skeels.                           | Myrtaceae     | Wild                | Dicot      | Evergreen | (✗)                                              |
| Salt wattle     | <i>Acacia ampliceps</i> Maslin                                | Fabaceae      | Wild                | Dicot      | Evergreen | (✓)                                              |
| Anar            | <i>Punica granatum</i> L.                                     | Lythraceae    | Cultivated          | Dicot      | Deciduous | (✗)                                              |
| Neem            | <i>Azadirachta indica</i> A. Juss                             | Meliaceae     | Wild                | Monocot    | Deciduous | (✗)                                              |
| Subabul         | <i>Leucaena leucocephala</i> (Lam.)<br>de Wit                 | Fabaceae      | Wild                | Dicot      | Evergreen | (✓)                                              |
| Shisham         | <i>Dalbergia sissoo</i> Roxb.                                 | Fabaceae      | Cultivated          | Dicot      | Deciduous | (✓)                                              |

# Common Nursery Host, # Fix Nitrogen through Frankia

**Table S16.** Physico-chemical properties of the soil before conducting the experiment.

| Soil Parameter                                      | Values       |
|-----------------------------------------------------|--------------|
| pH <sub>2</sub>                                     | 7.03± 0.47   |
| EC <sub>e</sub> (dS m <sup>-1</sup> )               | 1.49 ± 0.21  |
| Texture                                             | Sandy loam   |
| Organic carbon (g kg <sup>-1</sup> )                | 0.697±0.02   |
| Available Nitrogen (N) kg ha <sup>-1</sup>          | 133.8 ±14.04 |
| Available Phosphorus (P) kg ha <sup>-1</sup>        | 33.77±4.28   |
| Available Potassium (K) kg ha <sup>-1</sup>         | 358.4±10.59  |
| Na <sup>+</sup> (ppm)                               | 160          |
| Ca <sup>++</sup> (meqL <sup>-1</sup> )              | 4.8          |
| Mg <sup>++</sup> (meqL <sup>-1</sup> )              | 4.8          |
| Cl <sup>-</sup> (meqL <sup>-1</sup> )               | 1.5          |
| CO <sub>3</sub> <sup>-</sup> (meqL <sup>-1</sup> )  | 0.0          |
| HCO <sub>3</sub> <sup>-</sup> (meqL <sup>-1</sup> ) | 0.9          |

Note: Data were expressed as the means of 10 replications and presented as means values ± standard deviation

**Table S17.** Quality parameters of applied irrigation water.

| Properties                                                | Saline water | Best available water |
|-----------------------------------------------------------|--------------|----------------------|
| pH <sub>2</sub>                                           | 8.03 ± 0.47  | 7.41± 0.51           |
| EC <sub>2</sub> (dS m <sup>-1</sup> )                     | 16.49 ± 0.21 | 0.72 ± 0.05          |
| Na <sup>+</sup> (meqL <sup>-1</sup> )                     | 162          | 3.28                 |
| K <sup>+</sup> (meqL <sup>-1</sup> )                      | 1.1          | 0.14                 |
| Ca <sup>++</sup> + Mg <sup>++</sup> (meqL <sup>-1</sup> ) | 60           | 4.2                  |
| Cl <sup>-</sup> (meqL <sup>-1</sup> )                     | 97           | 1.3                  |
| CO <sub>3</sub> <sup>-</sup> (meqL <sup>-1</sup> )        | 1.5          | Nil                  |
| HCO <sub>3</sub> <sup>-</sup> (meqL <sup>-1</sup> )       | 1.8          | 3.4                  |

Note: Data were expressed as the means of 10 replications and presented as means values ± standard deviation
